# Supplementary material
Source: ML conference proceedings conference paper supplement (https://openreview.net/forum?id=BZ9U_Ij5l9)
Supplement: supplementary_material [file attachment]

---

## Active Approximately Metric-Fair Learning (Supplementary Material)

---

Yiting Cao<sup>1</sup>

Chao Lan<sup>1</sup>

<sup>1</sup>School of Computer Science, University of Oklahoma, Norman, Oklahoma, USA

**Lemma 0.1** (Lemma 3.5). *Fix any  $t, \beta > 0$ . Let  $F : X \times X \rightarrow \mathbb{R}$  be a hypothesis class induced from  $H$  such that  $\forall f \in F$ ,  $f(x, x') = \tau_\beta^t(|h(x) - h(x')|)$  where  $\tau_\beta^t(z)$  is a piecewise model outputting 1 if  $z > \beta + \frac{1}{t}$ , outputting 0 if  $z \leq \beta$  and  $t(z - \beta)$  otherwise. Then  $\mathcal{R}_m(F) \leq 8t \cdot \mathcal{R}_m(H)$ .*

*Proof.* Let  $G : X \times X \rightarrow \mathbb{R}$  be the set of functions induced from  $h$  and defined as  $\forall g \in G$ ,  $g(a, b) = h(a) - h(b)$ . Let  $abs$  be the absolute function. Then  $f(a, b) = \tau_\beta^t \circ abs \circ g(a, b)$  and we can write, accordingly,

$$F = \tau_\beta^t \circ abs \circ G. \quad (1)$$

We first show  $\mathcal{R}_m(F) \leq \mathcal{R}_m(G)$ . This is true because

$$\mathcal{R}_m(F) = \mathcal{R}_m(\tau_\beta^t \circ abs \circ G) \leq 2t \cdot \mathcal{R}_m(abs \circ G) \leq 4t \cdot \mathcal{R}_m(G), \quad (2)$$

where both inequalities are by the property of Rademacher complexity for composite function with one component being Lipschitz continuous e.g., [Bartlett and Mendelson, 2002, Theorem 12] and the facts that  $\tau_\beta^t$  and  $abs$  are both Lipschitz with constants  $t$  and 1 respectively.

We then show  $\mathcal{R}_m(G) \leq 2 \cdot \mathcal{R}_m(H)$ . This is true because

$$\begin{aligned} \mathcal{R}_m(G) &= \mathbb{E}_{\{(a_i, b_i)\}} \mathbb{E}_\sigma \sup_{g \in G} \frac{1}{m} \sum_{i=1}^m \sigma_i g(a_i, b_i) \\ &= \mathbb{E}_{\{(a_i, b_i)\}} \mathbb{E}_\sigma \sup_{g \in G} \frac{1}{m} \sum_{i=1}^m \sigma_i [h(a_i) - h(b_i)] \\ &\leq \mathbb{E}_{\{(a_i, b_i)\}} \mathbb{E}_\sigma \sup_{g \in G} \frac{1}{m} \sum_{i=1}^m \sigma_i h(a_i) + \mathbb{E}_{\{(a_i, b_i)\}} \mathbb{E}_\sigma \sup_{g \in G} \frac{1}{m} \sum_{i=1}^m \sigma_i h(b_i) \\ &= 2 \cdot \mathbb{E}_{\{(a_i, b_i)\}} \mathbb{E}_\sigma \sup_{g \in G} \frac{1}{m} \sum_{i=1}^m \sigma_i h(x_i) \\ &= 2 \cdot \mathcal{R}_m(H), \end{aligned} \quad (3)$$

where the third equality is based on the fact that  $\sigma_i$  is uniform in  $\{-1, 1\}$  so the expectation with respect to  $\sigma_i$  is the same as the expectation with respect to  $-\sigma_i$ .

Combining (2) and (3) proves the lemma. □

**Theorem 0.2** (Theorem 3.6). *Fix any  $\alpha, \beta, t > 0$ . Suppose  $\mathcal{R}_m(H) \in O(1/\sqrt{m})$ . Any model  $h \in H$  returned by the AMF learner satisfies  $\Delta_{\alpha, \beta+1/t}(h) \leq \varepsilon$  with probability at least  $1 - \delta$  if  $m \geq \frac{1}{\varepsilon^2} \left( 16tc + \sqrt{\frac{1}{2} \log \frac{1}{\delta}} \right)$ , where  $m$  is the number of  $(x, x') \in S$  satisfying  $d(x, x') \leq \alpha$  and  $c$  is a constant inherited from  $O(1/\sqrt{m})$ .*

*Proof.* To facilitate discussion, define two functions

$$\tau_\beta(z) = \begin{cases} 1, & \text{if } z > \beta \\ 0, & \text{if } z \leq \beta \end{cases}, \quad (4)$$

and

$$\tau_\beta^t(z) = \begin{cases} 1, & \text{if } z > \beta + \frac{1}{t} \\ t(z - \beta), & \text{if } \beta < z \leq \beta + \frac{1}{t} \\ 0, & \text{if } z \leq \beta \end{cases}. \quad (5)$$

By definition, we have

$$\tau_{\beta+\frac{1}{t}}(z) \leq \tau_\beta^t(z) \leq \tau_\beta(z). \quad (6)$$

Recall  $S = \{(x_i, x_j)\}_{i,j=1,\dots,n}$ . Let  $S_\alpha$  be a subset of  $S$  defined as

$$S_\alpha = \{(a, b) \in S \mid d(a, b) \leq \alpha\}. \quad (7)$$

Suppose the size of  $S_\alpha$  is  $m$ . Then,

$$\begin{aligned} \Delta_{\alpha,\beta}(h; S) &= \frac{1}{n^2} \sum_{i,j=1}^n \mathbb{I}\{|h(x_i) - h(x_j)| > \beta, d(x_i, x_j) \leq \alpha\} \\ &= \frac{m}{n^2} \cdot \frac{1}{m} \sum_{(a,b) \in S_\alpha} \mathbb{I}\{|h(a) - h(b)| > \beta\} \\ &= \frac{m}{n^2} \cdot \frac{1}{m} \sum_{(a,b) \in S_\alpha} \tau_\beta(|h(a) - h(b)|). \end{aligned} \quad (8)$$

Recall  $F : X \times X \rightarrow \mathbb{R}$  is the set of functions induced from  $\tau_\beta^t$  and defined as  $\forall f \in F, f(a, b) = \tau_\beta^t(|h(a) - h(b)|)$ . We have that, with probability at least  $1 - \delta$ ,

$$\begin{aligned} \frac{1}{m} \sum_{(a,b) \in S_\alpha} \tau_\beta(|h(a) - h(b)|) &\geq \frac{1}{m} \sum_{(a,b) \in S_\alpha} \tau_\beta^t(|h(a) - h(b)|) \\ &\geq \mathbb{E}[\tau_\beta^t(|h(a) - h(b)|) \mid d(a, b) \leq \alpha] - 2\mathcal{R}_m(F) - \sqrt{\frac{\log \frac{1}{\delta}}{2m}} \\ &\geq \mathbb{E}[\tau_{\beta+\frac{1}{t}}(|h(a) - h(b)|) \mid d(a, b) \leq \alpha] - 16t\mathcal{R}_m(H) - \sqrt{\frac{\log \frac{1}{\delta}}{2m}} \\ &\geq \mathbb{E}[\tau_{\beta+\frac{1}{t}}(|h(a) - h(b)|) \mid d(a, b) \leq \alpha] - \frac{1}{\sqrt{m}} \left( 16tc + \sqrt{\frac{1}{2} \log \frac{1}{\delta}} \right). \end{aligned} \quad (9)$$

where for some constant  $c$ . In (9), the first inequality is by (6); the second one is by standard generalization bound<sup>1</sup> with Rademacher complexity e.g. [Mohri et al., 2018, Theorem 3.3] conditioned on  $d(a, b) \leq \alpha$ ; the third one is by (6) and Lemma 3.5; and the last one holds since  $\mathcal{R}_m \in O(1/\sqrt{m})$ . Note the expectation of  $(a, b) \in S_\alpha$  in  $\mathcal{R}_m \in O(1/\sqrt{m})$  is also conditioned on  $d(a, b) \leq \alpha$ , and we always assume  $\mathcal{R}_m \in O(1/\sqrt{m})$  w.r.t. any proper data distribution.

Combining (8) and (9), we see  $\Delta_{\alpha,\beta}(h; S) = 0$  implies

$$\mathbb{E}[\tau_{\beta+\frac{1}{t}}(|h(a) - h(b)|) \mid d(a, b) \leq \alpha] \leq \frac{1}{m} \left( 16tc + \sqrt{\frac{1}{2} \log \frac{1}{\delta}} \right). \quad (10)$$

<sup>1</sup>Here we follow Yona and Rothblum [2018] and treat  $S_\alpha$  as an i.i.d. sample. If it is not, we can either add an additional constraint that no two pairs in  $S_\alpha$  share the same instance so it can be viewed as an i.i.d. sample, or apply a generalization error bound on non-i.i.d. sample e.g. Mohri and Rostamizadeh [2008]. In either case, the order of our result remains the same.

Further, we can show

$$\Delta_{\alpha, \beta + \frac{1}{t}}(h) \leq \mathbb{E}[\tau_{\beta + \frac{1}{t}}(|h(a) - h(b)|) \mid d(a, b) \leq \alpha], \quad (11)$$

because

$$\begin{aligned} \Delta_{\alpha, \beta + \frac{1}{t}}(h) &= \int_{(a,b) \in X \times X} \mathbb{I}\{|h(a) - h(b)| > \beta + 1/t\} \cdot \mathbb{I}\{d(a, b) \leq \alpha\} \cdot p(a, b) \\ &\leq \int_{(a,b) \in X \times X} \mathbb{I}\{|h(a) - h(b)| > \beta + 1/t\} \cdot p(a, b) \\ &\leq \int_{(a,b) \in X \times X} \mathbb{I}\{|h(a) - h(b)| > \beta + 1/t\} \cdot p(a, b \mid d(a, b) \leq \alpha) \\ &= \mathbb{E}[\tau_{\beta + \frac{1}{t}}(|h(a) - h(b)|) \mid d(a, b) \leq \alpha]. \end{aligned} \quad (12)$$

Combining (10) and (11), and upper bounding the RHS of (10) by  $\varepsilon$  implies that  $\Delta_{\alpha, \beta + \frac{1}{t}}(h) \leq \varepsilon$  whenever

$$m \geq \frac{1}{\varepsilon^2} \left( 16tc + \sqrt{\frac{1}{2} \log \frac{1}{\delta}} \right). \quad (13)$$

The theorem is proved.  $\square$

**Theorem 0.3** (Theorem 4.2). *Fix any  $\alpha, \beta > 0$ . Suppose  $\mathcal{R}_m(H) \in O(1/\sqrt{m})$  and the counter  $(\alpha, \beta)$  AMF coefficient w.r.t.  $H$  is bounded. Then, with probability at least  $1 - \delta$ , any  $h \in H$  returned by Algorithm 1 satisfies  $\Delta_{\alpha, \beta}(h) \leq \varepsilon$  after  $O(\log \frac{1}{\varepsilon})$  labeling.*

*Proof.* Suppose we have performed  $q$  rounds of labeling. Let  $L_q$  be the updated training set and  $S_q$  be the associated set of instance pairs in Definition 3.4. Define

$$V_q = \{h \in H; \Delta_{\alpha, \beta}(h; S_q) = 0\}. \quad (14)$$

Consider labeling  $m$  instances in round  $q + 1$ . First, note that all labeled instances fall in  $\mathcal{C}_{\alpha, \beta}(V_q)$  and thus will add to  $S_q$  at least  $m$  pairs of  $(x, x')$  satisfying  $d(x, x') \leq \alpha$ . Then, by Theorem 0.2 and setting  $t = 1/\beta$ , if  $m \geq \frac{1}{4\varepsilon^2} \left( 32c/\beta + \sqrt{\frac{1}{2} \log \frac{1}{\delta'}} \right)$ , with probability at least  $1 - \delta'$ , any  $h \in V_{q+1}$  satisfies

$$\Delta_{\alpha, \beta}(h) \leq 1/(2\xi). \quad (15)$$

Let  $\&$  be logic ‘AND’ and define event

$$I_{\alpha}^{\beta}(x, x'; h) := d(x, x') \leq \alpha \& |h(x) - h(x')| > \beta. \quad (16)$$

Then, with probability at least  $1 - \delta'$ , any  $h \in V_{q+1}$  satisfies

$$\begin{aligned} \Pr\{I_{\alpha}^{\beta}(x, x'; h)\} &= \Pr\{I_{\alpha}^{\beta}(x, x'; h) \& (x, x') \in \mathcal{C}_{\alpha, \beta}(V_q)\} + \Pr\{I_{\alpha}^{\beta}(x, x'; h) \& (x, x') \notin \mathcal{C}_{\alpha, \beta}(V_q)\} \\ &= \Pr\{I_{\alpha}^{\beta}(x, x'; h) \& (x, x') \in \mathcal{C}_{\alpha, \beta}(V_q)\} \\ &= \Pr\{I_{\alpha}^{\beta}(x, x'; h) \mid (x, x') \in \mathcal{C}_{\alpha, \beta}(V_q)\} \cdot \Pr\{(x, x') \in \mathcal{C}_{\alpha, \beta}(V_q)\} \\ &\leq \frac{\Pr\{(x, x') \in \mathcal{C}_{\alpha, \beta}(V_q)\}}{2\xi}, \end{aligned} \quad (17)$$

where the second equality is by the fact that  $\Pr\{I_{\alpha}^{\beta}(x, x'; h) \& (x, x') \notin \mathcal{C}_{\alpha, \beta}(V_q)\} \leq \Pr\{I_{\alpha}^{\beta}(x, x'; h) \& (x, x') \notin \mathcal{C}_{\alpha, \beta}(V_{q+1})\} = 0$ , and the inequality is by (15) conditioned on an additional fact that all labeled instances fall in  $\mathcal{C}_{\alpha, \beta}(V_{q+1})$ . For conciseness, we will write  $\Pr\{\mathcal{C}_{\alpha, \beta}(V_q)\}$  for  $\Pr\{(x, x') \in \mathcal{C}_{\alpha, \beta}(V_q)\}$ .

Result in (17) implies  $V_{q+1} \subseteq \mathcal{B}\left(\frac{\Pr\{\mathcal{C}_{\alpha,\beta}(V_q)\}}{2\xi}\right)$  and

$$\Pr\{\mathcal{C}_{\alpha,\beta}(V_{q+1})\} \leq \Pr\left\{\mathcal{C}_{\alpha,\beta}\left(\mathcal{B}_{\alpha,\beta}\left(\frac{\Pr\{\mathcal{C}_{\alpha,\beta}(V_q)\}}{2\xi}\right)\right)\right\} \leq \xi \cdot \frac{\Pr\{\mathcal{C}_{\alpha,\beta}(V_q)\}}{2\xi} = \frac{\Pr\{\mathcal{C}_{\alpha,\beta}(V_q)\}}{2}, \quad (18)$$

where the first inequality is by the definition of  $\xi$ . This result means  $\Pr\{\mathcal{C}_{\alpha,\beta}(V_q)\}$  is halved after each round of labeling. Therefore, after  $Q := \log_2 \frac{1}{\varepsilon}$  rounds of labeling,

$$\Delta_{\alpha,\beta}(h) \leq \Pr\{\mathcal{C}_{\alpha,\beta}(V_Q)\} \leq \varepsilon, \quad (19)$$

with probability at least  $1 - Q\delta'$ ; where the left inequality is by definition. By then, the total number of labeled instances is  $\log_2 \frac{1}{\varepsilon} \cdot \frac{1}{4\xi^2} \left(32c/\beta + \sqrt{\frac{1}{2} \log \frac{1}{\delta'}}\right)$ . Setting  $\delta = Q\delta'$  and plugging  $\delta' = \delta/Q$  in completes the proof.  $\square$

**Lemma 0.4** (Lemma 5.1). *Fix any  $\alpha, \beta > 0$ . We have  $\Delta_{\alpha,\beta}(h; S) \leq \tilde{\Delta}_{\alpha,\beta}(h; S)$  for any  $h \in S$  and sample  $S$ .*

*Proof.* Since  $\mathbb{I}_{x \geq t} \leq \frac{x}{t}$  for any  $x, t \geq 0$ , we have

$$\begin{aligned} \mathbb{I}\{d(x_i, x_j) \leq \alpha, |h(x_i) - h(x_j)| \geq \beta\} &= \mathbb{I}\{d(x_i, x_j) \leq \alpha\} \cdot \mathbb{I}\{|h(x_i) - h(x_j)|^2 \geq \beta^2\} \\ &\leq \frac{1}{\beta^2} \cdot \mathbb{I}\{d(x_i, x_j) \leq \alpha\} \cdot |h(x_i) - h(x_j)|^2 \\ &= \frac{1}{\beta^2} \cdot M_{ij} \cdot |h(x_i) - h(x_j)|^2. \end{aligned} \quad (20)$$

Plugging this back to (6) proves the lemma.  $\square$

## References

- Peter L Bartlett and Shahar Mendelson. Rademacher and gaussian complexities: Risk bounds and structural results. *Journal of Machine Learning Research*, 3(Nov):463–482, 2002.
- Mehryar Mohri and Afshin Rostamizadeh. Rademacher complexity bounds for non-iid processes. *Advances in Neural Information Processing Systems*, 21, 2008.
- Mehryar Mohri, Afshin Rostamizadeh, and Ameet Talwalkar. *Foundations of machine learning*. MIT press, 2018.
- Gal Yona and Guy Rothblum. Probably approximately metric-fair learning. In *International Conference on Machine Learning*, pages 5680–5688. PMLR, 2018.
